# Supplementary material
Source: PubMed Central journal article supplement (PMC6432939)
Supplement: NIHMS1521934-supplement-1.pdf [file NIHMS1521934-supplement-1.pdf]

# Source Data Mapping Approach to CDMV5.0.1

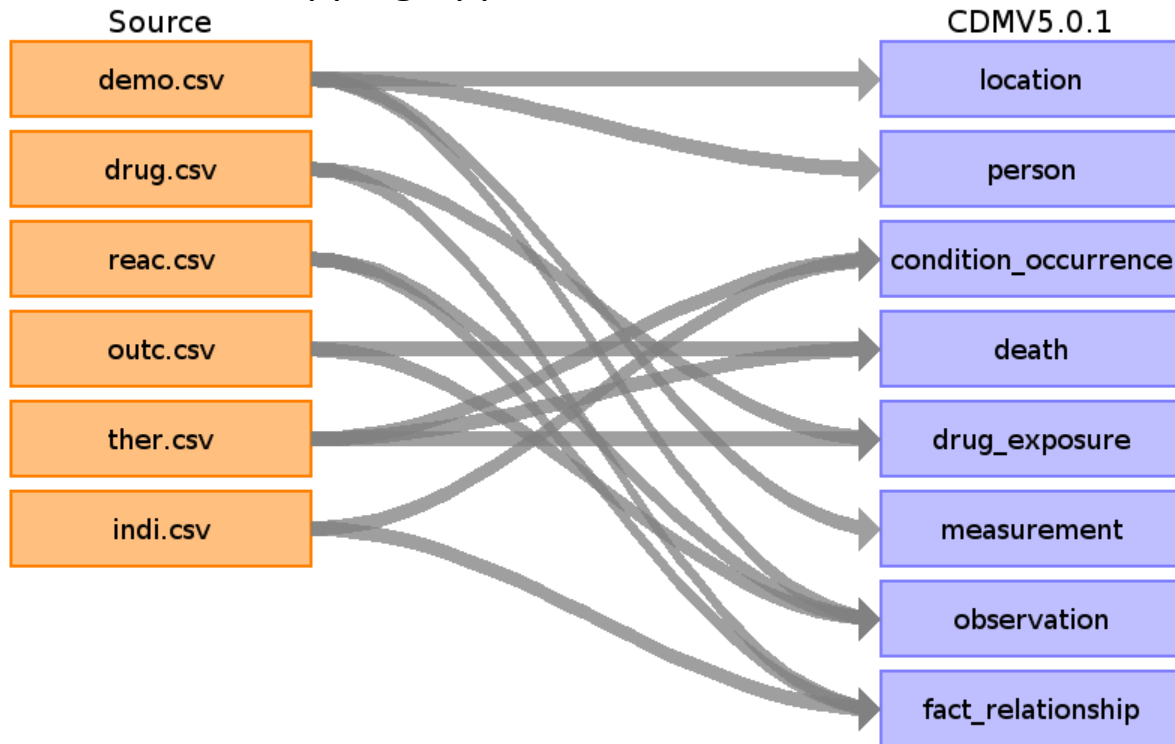

# Table name: location

Reading from demo.csv

Source

occr\_country

CDMV5.0.1

location\_source\_value

| Destination Field     | Source Field | Logic | Comment |
|-----------------------|--------------|-------|---------|
| location_id           |              |       |         |
| address_1             |              |       |         |
| address_2             |              |       |         |
| city                  |              |       |         |
| state                 |              |       |         |
| zip                   |              |       |         |
| county                |              |       |         |
| location_source_value | occr_country |       |         |

# Table name: person

Reading from demo.csv

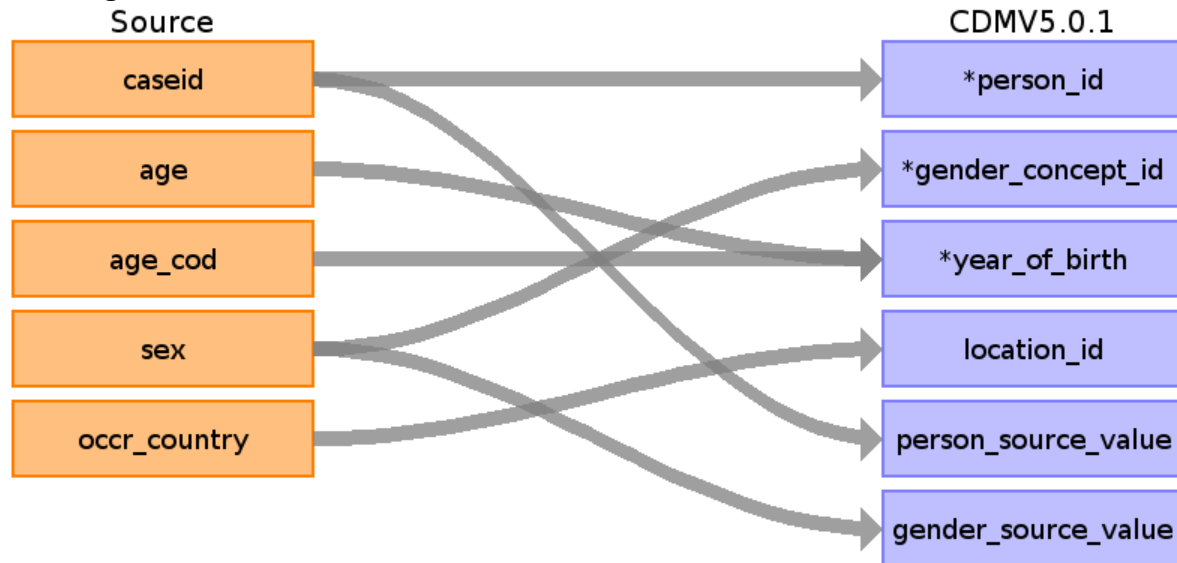

| Destination Field           | Source Field   | Logic | Comment |
|-----------------------------|----------------|-------|---------|
| person_id                   | caseid         |       |         |
| gender_concept_id           | sex            |       |         |
| year_of_birth               | age<br>age_cod |       |         |
| month_of_birth              |                |       |         |
| day_of_birth                |                |       |         |
| time_of_birth               |                |       |         |
| race_concept_id             |                |       |         |
| ethnicity_concept_id        |                |       |         |
| location_id                 | occr_country   |       |         |
| provider_id                 |                |       |         |
| care_site_id                |                |       |         |
| person_source_value         | caseid         |       |         |
| gender_source_value         | sex            |       |         |
| gender_source_concept_id    |                |       |         |
| race_source_value           |                |       |         |
| race_source_concept_id      |                |       |         |
| ethnicity_source_value      |                |       |         |
| ethnicity_source_concept_id |                |       |         |

## Table name: condition\_occurrence

Reading from indi.csv

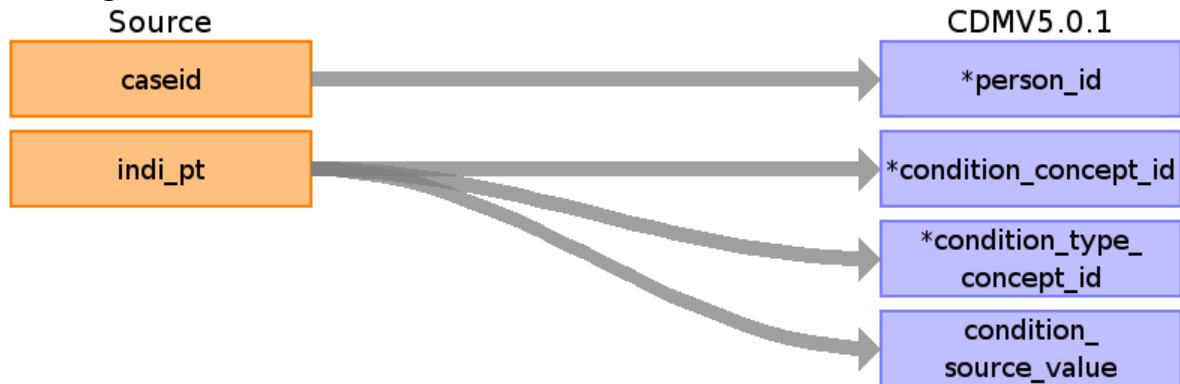

| Destination Field           | Source Field | Logic | Comment |
|-----------------------------|--------------|-------|---------|
| condition_occurrence_id     |              |       |         |
| person_id                   | caseid       |       |         |
| condition_concept_id        | indi_pt      |       |         |
| condition_start_date        |              |       |         |
| condition_end_date          |              |       |         |
| condition_type_concept_id   | indi_pt      |       |         |
| stop_reason                 |              |       |         |
| provider_id                 |              |       |         |
| visit_occurrence_id         |              |       |         |
| condition_source_value      | indi_pt      |       |         |
| condition_source_concept_id |              |       |         |

Reading from ther.csv

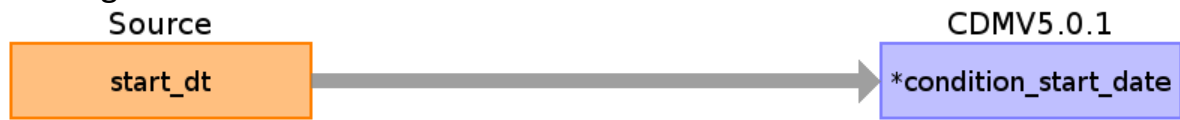

| Destination Field           | Source Field | Logic | Comment |
|-----------------------------|--------------|-------|---------|
| condition_occurrence_id     |              |       |         |
| person_id                   |              |       |         |
| condition_concept_id        |              |       |         |
| condition_start_date        | start_dt     |       |         |
| condition_end_date          |              |       |         |
| condition_type_concept_id   |              |       |         |
| stop_reason                 |              |       |         |
| provider_id                 |              |       |         |
| visit_occurrence_id         |              |       |         |
| condition_source_value      |              |       |         |
| condition_source_concept_id |              |       |         |

## Table name: death

Reading from outc.csv

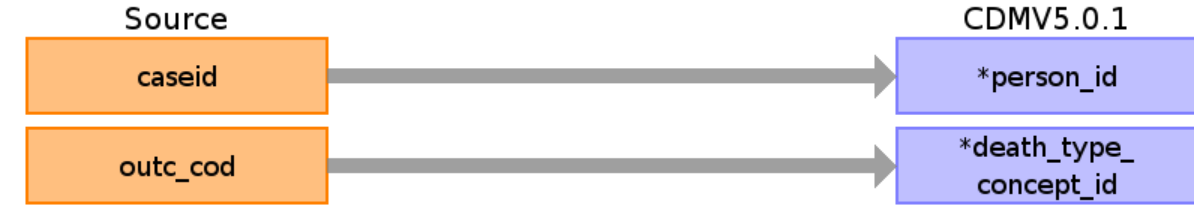

| Destination Field       | Source Field | Logic | Comment |
|-------------------------|--------------|-------|---------|
| person_id               | caseid       |       |         |
| death_date              |              |       |         |
| death_type_concept_id   | outc_cod     |       |         |
| cause_concept_id        |              |       |         |
| cause_source_value      |              |       |         |
| cause_source_concept_id |              |       |         |

Reading from ther.csv

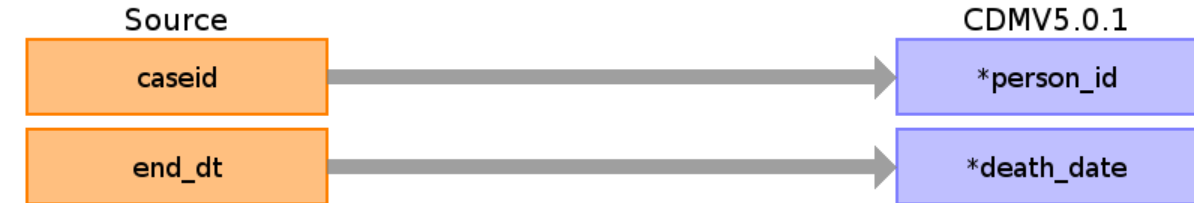

| Destination Field       | Source Field | Logic | Comment |
|-------------------------|--------------|-------|---------|
| person_id               | caseid       |       |         |
| death_date              | end_dt       |       |         |
| death_type_concept_id   |              |       |         |
| cause_concept_id        |              |       |         |
| cause_source_value      |              |       |         |
| cause_source_concept_id |              |       |         |

# Table name: drug\_exposure

Reading from drug.csv

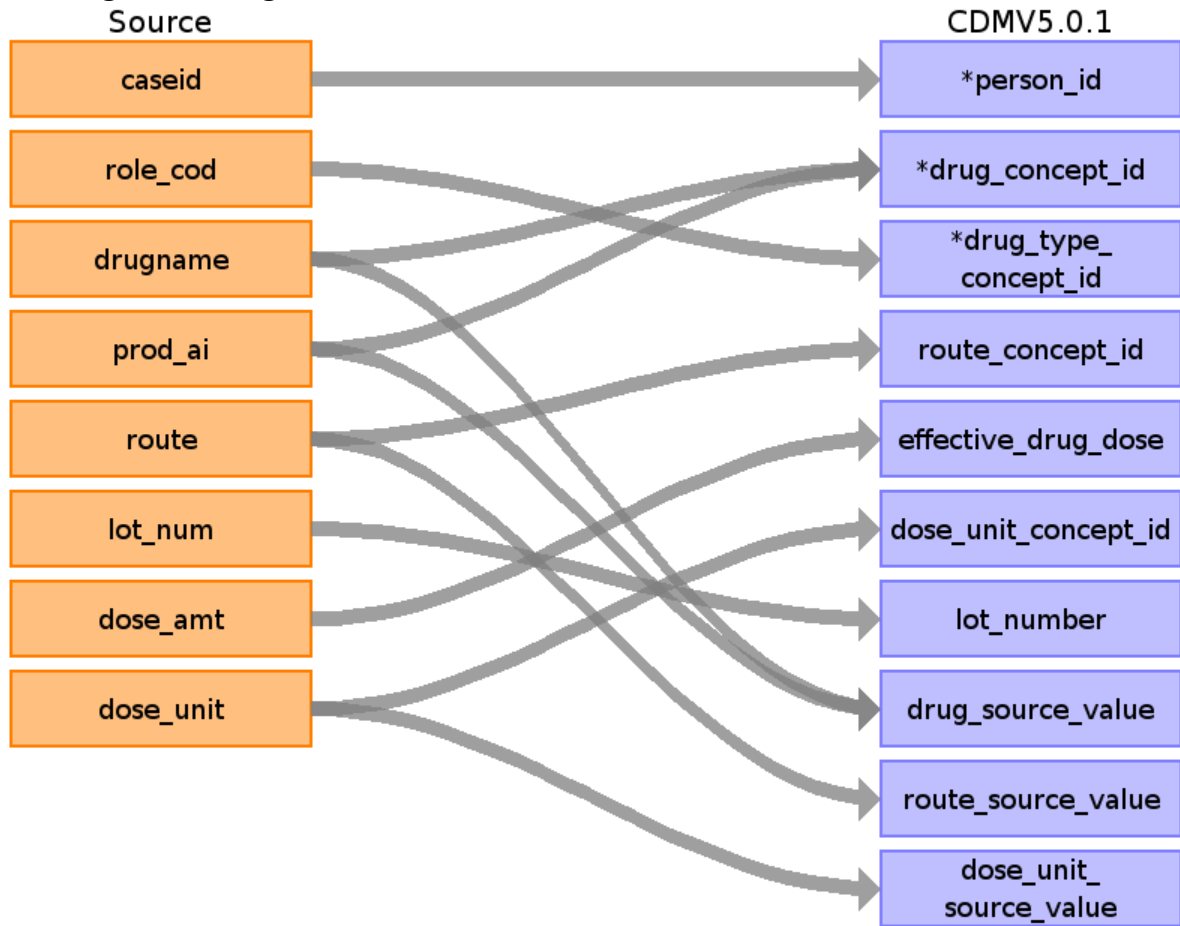

| Destination Field        | Source Field        | Logic | Comment |
|--------------------------|---------------------|-------|---------|
| drug_exposure_id         |                     |       |         |
| person_id                | caseid              |       |         |
| drug_concept_id          | drugname<br>prod_ai |       |         |
| drug_exposure_start_date |                     |       |         |
| drug_exposure_end_date   |                     |       |         |
| drug_type_concept_id     | role_cod            |       |         |
| stop_reason              |                     |       |         |
| refills                  |                     |       |         |
| quantity                 |                     |       |         |
| days_supply              |                     |       |         |
| sig                      |                     |       |         |
| route_concept_id         | route               |       |         |
| effective_drug_dose      | dose_amt            |       |         |
| dose_unit_concept_id     | dose_unit           |       |         |
| lot_number               | lot_num             |       |         |

|                        |                     |  |  |
|------------------------|---------------------|--|--|
| provider_id            |                     |  |  |
| visit_occurrence_id    |                     |  |  |
| drug_source_value      | drugname<br>prod_ai |  |  |
| drug_source_concept_id |                     |  |  |
| route_source_value     | route               |  |  |
| dose_unit_source_value | dose_unit           |  |  |

Reading from ther.csv

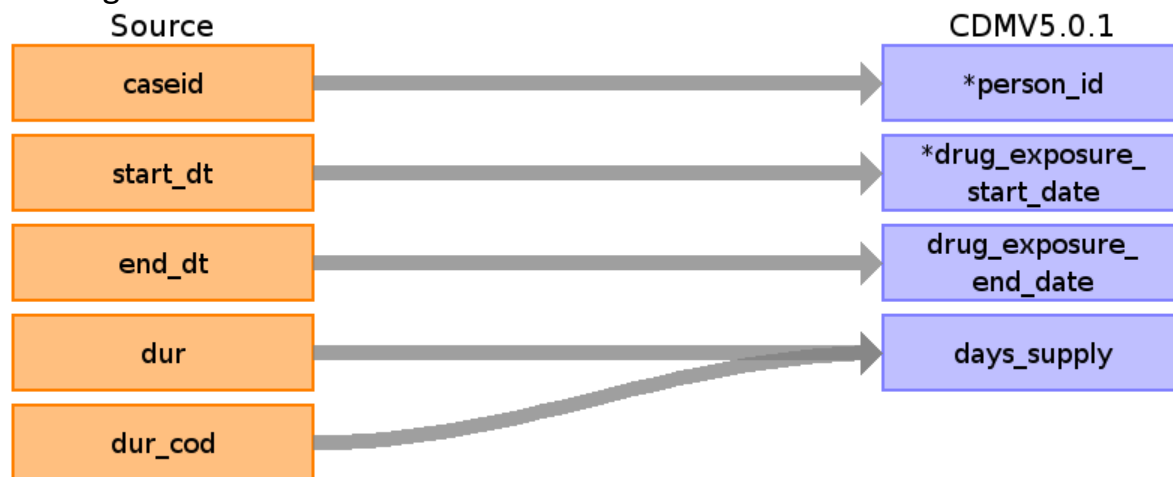

| Destination Field        | Source Field   | Logic | Comment |
|--------------------------|----------------|-------|---------|
| drug_exposure_id         |                |       |         |
| person_id                | caseid         |       |         |
| drug_concept_id          |                |       |         |
| drug_exposure_start_date | start_dt       |       |         |
| drug_exposure_end_date   | end_dt         |       |         |
| drug_type_concept_id     |                |       |         |
| stop_reason              |                |       |         |
| refills                  |                |       |         |
| quantity                 |                |       |         |
| days_supply              | dur<br>dur_cod |       |         |
| sig                      |                |       |         |
| route_concept_id         |                |       |         |
| effective_drug_dose      |                |       |         |
| dose_unit_concept_id     |                |       |         |
| lot_number               |                |       |         |
| provider_id              |                |       |         |
| visit_occurrence_id      |                |       |         |
| drug_source_value        |                |       |         |
| drug_source_concept_id   |                |       |         |
| route_source_value       |                |       |         |
| dose_unit_source_value   |                |       |         |

# Table name: measurement

Reading from demo.csv

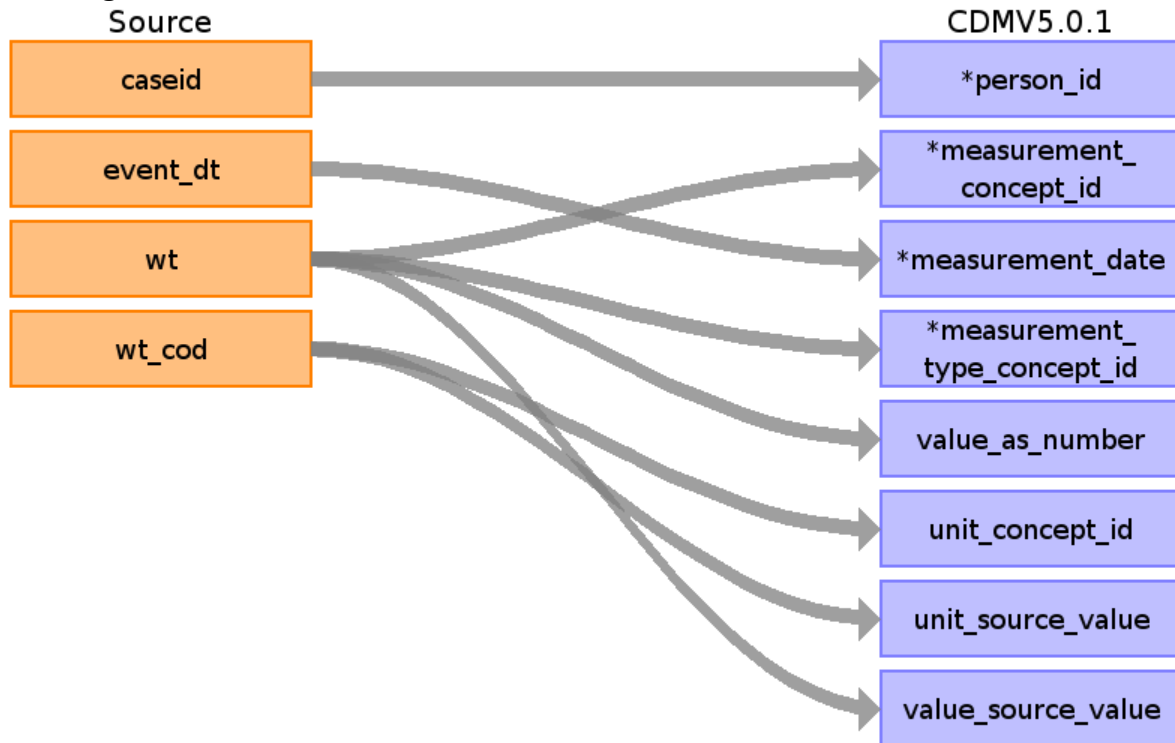

| Destination Field             | Source Field | Logic | Comment |
|-------------------------------|--------------|-------|---------|
| measurement_id                |              |       |         |
| person_id                     | caseid       |       |         |
| measurement_concept_id        | wt           |       |         |
| measurement_date              | event_dt     |       |         |
| measurement_time              |              |       |         |
| measurement_type_concept_id   | wt           |       |         |
| operator_concept_id           |              |       |         |
| value_as_number               | wt           |       |         |
| value_as_concept_id           |              |       |         |
| unit_concept_id               | wt_cod       |       |         |
| range_low                     |              |       |         |
| range_high                    |              |       |         |
| provider_id                   |              |       |         |
| visit_occurrence_id           |              |       |         |
| measurement_source_value      |              |       |         |
| measurement_source_concept_id |              |       |         |
| unit_source_value             | wt_cod       |       |         |
| value_source_value            | wt           |       |         |



## Table name: observation

Reading from reac.csv

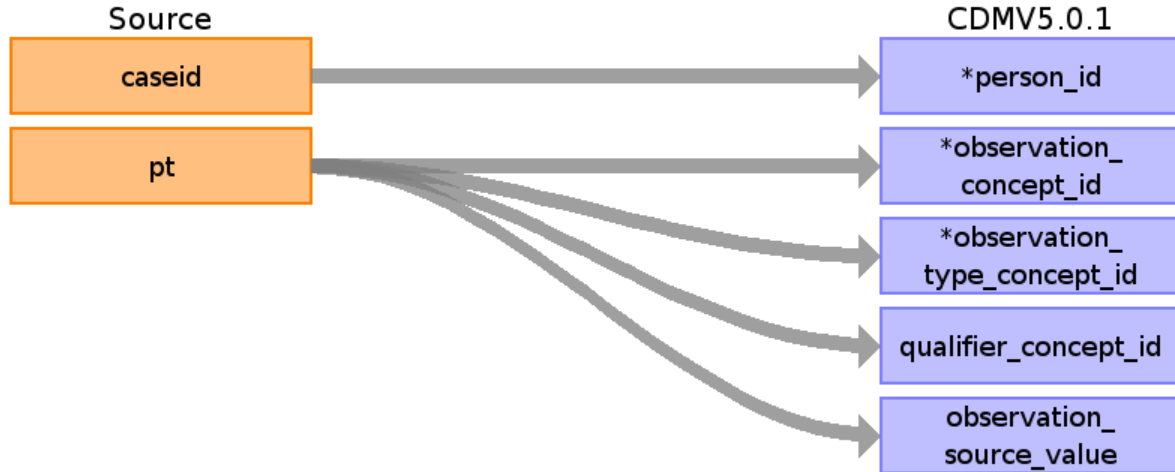

| Destination Field             | Source Field | Logic | Comment |
|-------------------------------|--------------|-------|---------|
| observation_id                |              |       |         |
| person_id                     | caseid       |       |         |
| observation_concept_id        | pt           |       |         |
| observation_date              |              |       |         |
| observation_time              |              |       |         |
| observation_type_concept_id   | pt           |       |         |
| value_as_number               |              |       |         |
| value_as_string               |              |       |         |
| value_as_concept_id           |              |       |         |
| qualifier_concept_id          | pt           |       |         |
| unit_concept_id               |              |       |         |
| provider_id                   |              |       |         |
| visit_occurrence_id           |              |       |         |
| observation_source_value      | pt           |       |         |
| observation_source_concept_id |              |       |         |
| unit_source_value             |              |       |         |
| qualifier_source_value        |              |       |         |

Reading from demo.csv

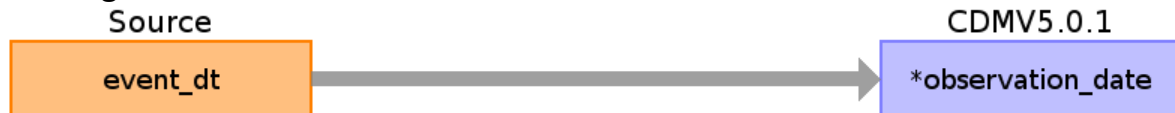

| Destination Field      | Source Field | Logic | Comment |
|------------------------|--------------|-------|---------|
| observation_id         |              |       |         |
| person_id              |              |       |         |
| observation_concept_id |              |       |         |
| observation_date       | event_dt     |       |         |
| observation_time       |              |       |         |

|                               |  |  |  |
|-------------------------------|--|--|--|
| observation_type_concept_id   |  |  |  |
| value_as_number               |  |  |  |
| value_as_string               |  |  |  |
| value_as_concept_id           |  |  |  |
| qualifier_concept_id          |  |  |  |
| unit_concept_id               |  |  |  |
| provider_id                   |  |  |  |
| visit_occurrence_id           |  |  |  |
| observation_source_value      |  |  |  |
| observation_source_concept_id |  |  |  |
| unit_source_value             |  |  |  |
| qualifier_source_value        |  |  |  |

Reading from outc.csv

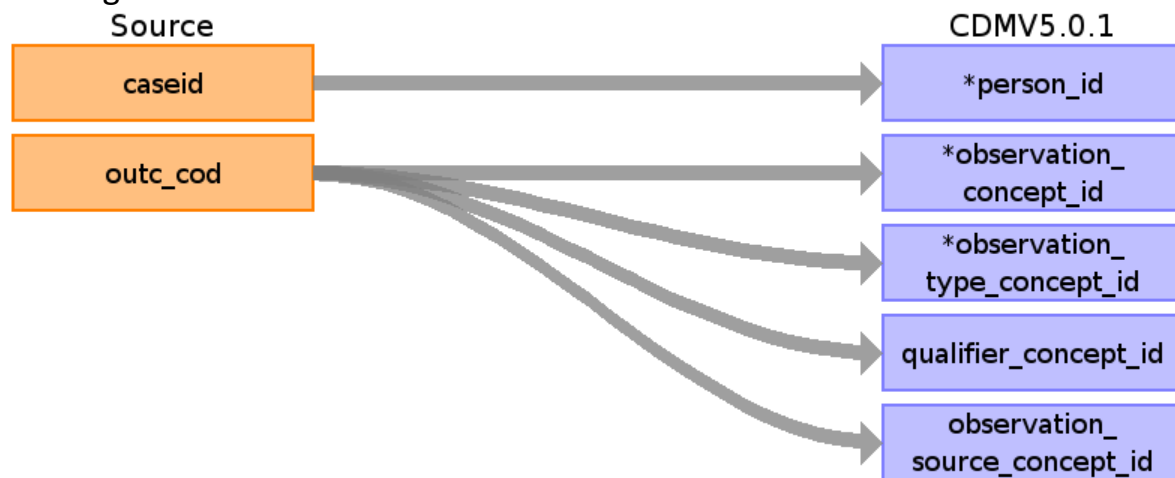

| Destination Field             | Source Field | Logic | Comment |
|-------------------------------|--------------|-------|---------|
| observation_id                |              |       |         |
| person_id                     | caseid       |       |         |
| observation_concept_id        | outc_cod     |       |         |
| observation_date              |              |       |         |
| observation_time              |              |       |         |
| observation_type_concept_id   | outc_cod     |       |         |
| value_as_number               |              |       |         |
| value_as_string               |              |       |         |
| value_as_concept_id           |              |       |         |
| qualifier_concept_id          | outc_cod     |       |         |
| unit_concept_id               |              |       |         |
| provider_id                   |              |       |         |
| visit_occurrence_id           |              |       |         |
| observation_source_value      |              |       |         |
| observation_source_concept_id | outc_cod     |       |         |
| unit_source_value             |              |       |         |
| qualifier_source_value        |              |       |         |

## Table name: fact\_relationship

Reading from drug.csv

Source

CDMV5.0.1

| Destination Field       | Source Field | Logic | Comment |
|-------------------------|--------------|-------|---------|
| domain_concept_id_1     |              |       |         |
| fact_id_1               |              |       |         |
| domain_concept_id_2     |              |       |         |
| fact_id_2               |              |       |         |
| relationship_concept_id |              |       |         |

Reading from reac.csv

Source

CDMV5.0.1

| Destination Field       | Source Field | Logic | Comment |
|-------------------------|--------------|-------|---------|
| domain_concept_id_1     |              |       |         |
| fact_id_1               |              |       |         |
| domain_concept_id_2     |              |       |         |
| fact_id_2               |              |       |         |
| relationship_concept_id |              |       |         |

Reading from indi.csv

Source

CDMV5.0.1

| Destination Field       | Source Field | Logic | Comment |
|-------------------------|--------------|-------|---------|
| domain_concept_id_1     |              |       |         |
| fact_id_1               |              |       |         |
| domain_concept_id_2     |              |       |         |
| fact_id_2               |              |       |         |
| relationship_concept_id |              |       |         |

## Appendix: source tables

Table: demo.csv

| Field            | Type    | Most freq. value  | Comment |
|------------------|---------|-------------------|---------|
| primaryid        | int     | List truncated... |         |
| caseid           | int     | List truncated... |         |
| caseversion      | int     | List truncated... |         |
| i_f_code         | varchar | F                 |         |
| event_dt         | int     | List truncated... |         |
| mfr_dt           | int     | List truncated... |         |
| init_fda_dt      | int     | 20140312          |         |
| fda_dt           | int     | List truncated... |         |
| rept_cod         | varchar | List truncated... |         |
| auth_num         | empty   |                   |         |
| mfr_num          | varchar | List truncated... |         |
| mfr_sndr         | varchar | List truncated... |         |
| lit_ref          | varchar |                   |         |
| age              | real    | List truncated... |         |
| age_cod          | varchar | YR                |         |
| age_grp          | empty   |                   |         |
| sex              | varchar | F                 |         |
| e_sub            | varchar | Y                 |         |
| wt               | real    | List truncated... |         |
| wt_cod           | varchar | List truncated... |         |
| rept_dt          | int     | List truncated... |         |
| to_mfr           | empty   |                   |         |
| occp_cod         | varchar | List truncated... |         |
| reporter_country | varchar | List truncated... |         |
| occr_country     | varchar | List truncated... |         |

Table: drug.csv

| Field         | Type    | Most freq. value  | Comment |
|---------------|---------|-------------------|---------|
| primaryid     | int     | 100035465         |         |
| caseid        | int     | 10003546          |         |
| drug_seq      | int     | List truncated... |         |
| role_cod      | varchar | List truncated... |         |
| drugname      | varchar | List truncated... |         |
| prod_ai       | varchar | List truncated... |         |
| val_vbm       | int     | 1                 |         |
| route         | varchar | Oral              |         |
| dose_vbm      | varchar | List truncated... |         |
| cum_dose_chr  | int     |                   |         |
| cum_dose_unit | varchar |                   |         |
| dechal        | varchar | U                 |         |
| rechal        | varchar |                   |         |

|           |          |                   |  |
|-----------|----------|-------------------|--|
| lot_num   | vvarchar |                   |  |
| exp_dt    | empty    |                   |  |
| nda_num   | int      | List truncated... |  |
| dose_amt  | real     |                   |  |
| dose_unit | vvarchar |                   |  |
| dose_form | vvarchar | List truncated... |  |
| dose_freq | vvarchar |                   |  |

Table: reac.csv

| Field        | Type     | Most freq. value  | Comment |
|--------------|----------|-------------------|---------|
| primaryid    | int      | 100035465         |         |
| caseid       | int      | 10003546          |         |
| pt           | vvarchar | List truncated... |         |
| drug_rec_act | empty    |                   |         |

Table: outc.csv

| Field     | Type     | Most freq. value  | Comment |
|-----------|----------|-------------------|---------|
| primaryid | int      | List truncated... |         |
| caseid    | int      | List truncated... |         |
| outc_cod  | vvarchar | OT                |         |

Table: rpsr.csv

| Field     | Type     | Most freq. value  | Comment |
|-----------|----------|-------------------|---------|
| primaryid | int      | List truncated... |         |
| caseid    | int      | List truncated... |         |
| rpsr_cod  | vvarchar | HP                |         |

Table: ther.csv

| Field        | Type  | Most freq. value | Comment |
|--------------|-------|------------------|---------|
| primaryid    | int   | 100048338        |         |
| caseid       | int   | 10004833         |         |
| dsg_drug_seq | int   | 1                |         |
| start_dt     | int   |                  |         |
| end_dt       | int   |                  |         |
| dur          | empty |                  |         |
| dur_cod      | empty |                  |         |

Table: indi.csv

| Field         | Type     | Most freq. value                    | Comment |
|---------------|----------|-------------------------------------|---------|
| primaryid     | int      | 100095954                           |         |
| caseid        | int      | 10009595                            |         |
| indi_drug_seq | int      | 1                                   |         |
| indi_pt       | vvarchar | Product used for unknown indication |         |
